# Supplementary material for: Bis(2,6-pyrazolyl)pyridines as a New Scaffold for Coordination Polymers
Source: MDPI journal article supplement (doi:10.3390/molecules28114275), 2023-05-23
Supplement: s1 [file s1]

## Supplementary Materials

for

### ***Bis(2,6-pyrazolyl)pyridines as a new scaffold for coordination polymers***

Igor A. Nikovskiy<sup>1,2</sup>, Pavel V. Dorovatovskii<sup>3</sup>, Valentin V. Novikov<sup>4\*</sup> and Yulia V. Nelyubina<sup>1,2\*</sup>

| Figure                                                                                                                                                                                  | Page number |
|-----------------------------------------------------------------------------------------------------------------------------------------------------------------------------------------|-------------|
| <b>S1.</b> Plausible mechanism for the PCET-assisted formation of $[\text{Fe}(\text{L}^{\text{OBF}_3})(\text{CH}_3\text{COO})(\text{CH}_3\text{CN})_2]_n \cdot n\text{CH}_3\text{CN}$ . | 3           |
| <b>S2.</b> Reactant diffusion technique used for crystal growth.                                                                                                                        | 3           |

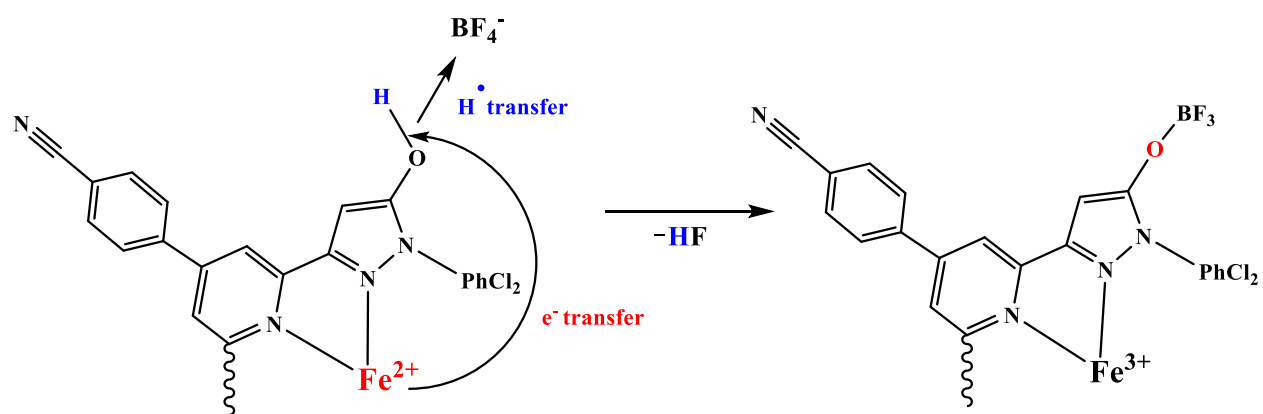

**Figure S1.** Plausible mechanism for the PCET-assisted formation of  $[\text{Fe}(\text{L}^{\text{OBF}_3})(\text{CH}_3\text{COO})(\text{CH}_3\text{CN})_2]_n \cdot n\text{CH}_3\text{CN}$ .

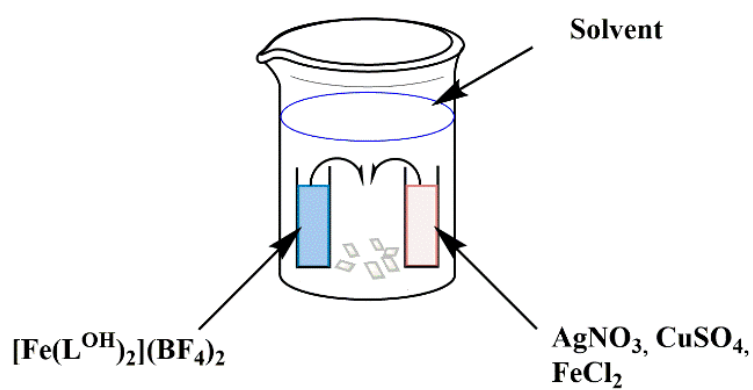

**Figure S2.** Reactant diffusion technique used for crystal growth.
